# Supplementary material for: Rape Straw Supported FeS Nanoparticles with Encapsulated Structure as Peroxymonosulfate and Hydrogen Peroxide Activators for Enhanced Oxytetracycline Degradation
Source: MDPI journal article supplement (doi:10.3390/molecules28062771), 2023-03-19

## **Supplementary Material**

### **Rape straw supported FeS nanoparticles with encapsulated structure as peroxymonosulfate and hydrogen peroxide activators for enhanced oxytetracycline degradation**

Guiyin Wang <sup>a, 1</sup>, Yan Yang <sup>a, 1</sup>, Xiaoxun Xu <sup>a, \*</sup>, Shirong Zhang <sup>a</sup>, Zhanbiao Yang <sup>a</sup>, Zhang Cheng <sup>a</sup>, Junren Xian <sup>a</sup>, Ting Li <sup>b</sup>, Yulin Pu <sup>b</sup>, Wei Zhou <sup>b</sup>, Gang Xiang <sup>c</sup>, Zhien Pu <sup>c</sup>

<sup>a</sup> College of Environmental Sciences, Sichuan Agricultural University, Chengdu 611130, China.

<sup>b</sup> College of Resources, Sichuan Agricultural University, Chengdu 611130, China.

<sup>c</sup> College of Agronomy, Sichuan Agricultural University, Chengdu 611130, China

\* Correspondence: Corresponding author at: College of Environmental Sciences, Sichuan Agricultural University, Wenjiang 611130, PR China. E-mail: xuxiaoxun@sicau.edu.cn; Fax: +86-028-8629-1233.

<sup>1</sup> These two authors contributed equally to this work.

Number of pages: 7

Number of Figures: 5

Number of Table: 1

**Table S1** Cost estimation of RS–FeS and RS–EDTA–FeS for the degradation of oxytetracycline

| Systems                                   | The cost of RS preparation (electricity) (CNY/L) | The cost of catalyst preparation |                             | The cost of the oxidants (CNY/L) | Total treatment cost (CNY/L) |
|-------------------------------------------|--------------------------------------------------|----------------------------------|-----------------------------|----------------------------------|------------------------------|
|                                           |                                                  | Reagent (CNY/L)                  | cost of electricity (CNY/L) |                                  |                              |
| RS–FeS/H <sub>2</sub> O <sub>2</sub>      | 0.03                                             | 0.22                             | 0.30                        | 0.005                            | 0.56                         |
| RS–FeS/PMS                                | 0.03                                             | 0.22                             | 0.30                        | 0.03                             | 0.58                         |
| RS–EDTA–FeS/H <sub>2</sub> O <sub>2</sub> | 0.03                                             | 0.39                             | 0.30                        | 0.005                            | 0.73                         |
| RS–EDTA–FeS/PMS                           | 0.03                                             | 0.39                             | 0.30                        | 0.03                             | 0.75                         |

**Fig. S1. RS-FeS and RS-EDTA-FeS after 30 days.**

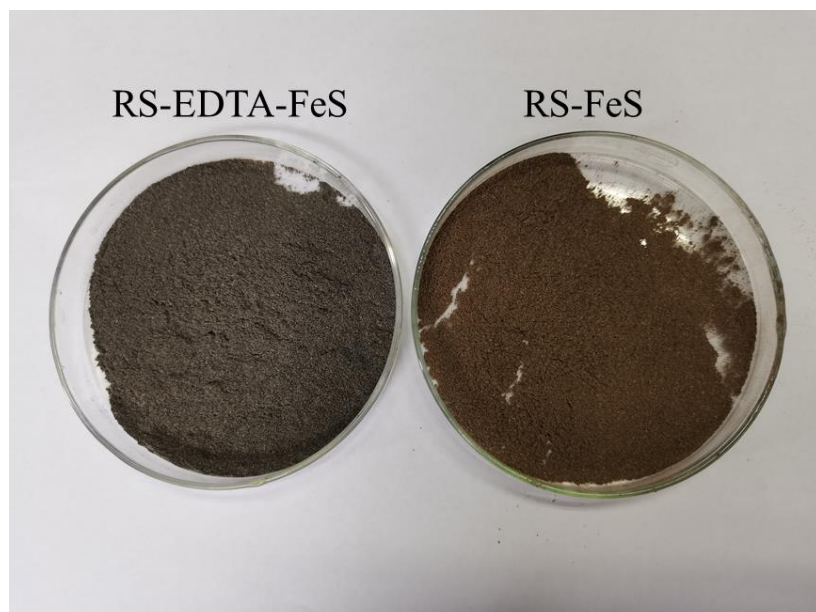

**Fig. S2. OTC adsorption capacity of RS-FeS and RS-EDTA-FeS.**

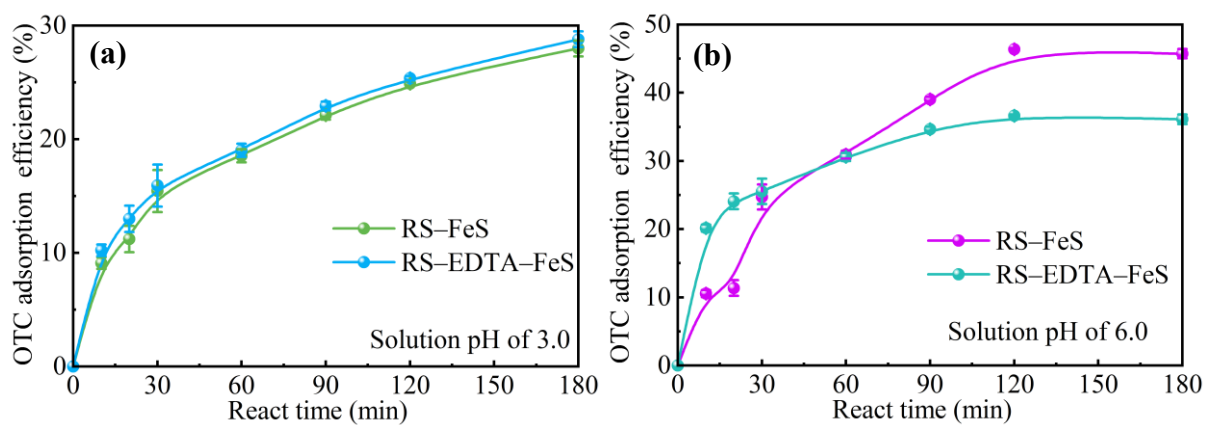

**Fig. S3. Degradation of OTC in different systems. Experiments conditions: initial OTC concentration = 20.00 mg L<sup>-1</sup>; H<sub>2</sub>O<sub>2</sub> = 20.00  $\mu$ L; PMS = 0.20 g L<sup>-1</sup>; pH of PMS system = 6.00, pH of H<sub>2</sub>O<sub>2</sub> system = 3.00.**

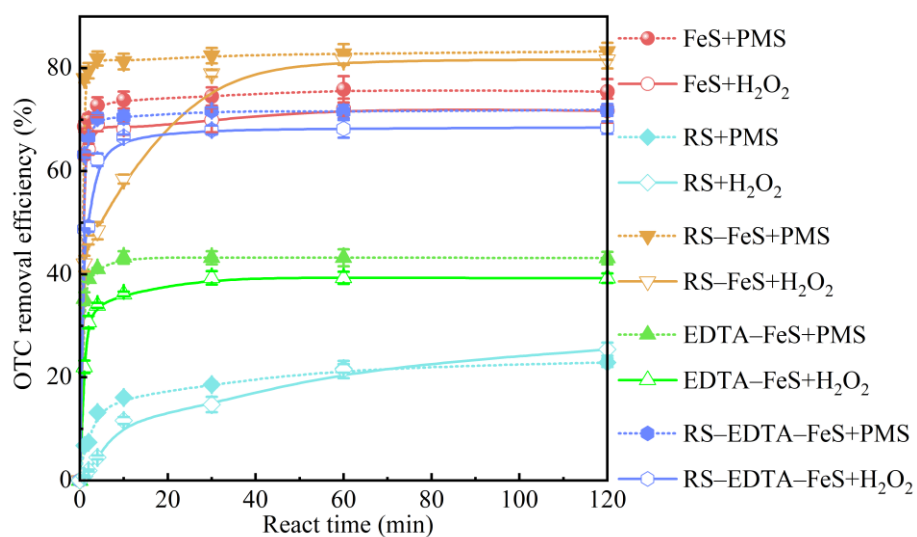

**Fig. S4.** Effect of initial OTC concentration on OTC removal from the RS–FeS/PMS (a) and RS–EDTA–FeS/PMS (b) system. Kinetic data of OTC by RS–FeS/PMS (c) and RS–EDTA–FeS/PMS (d) system under different initial OTC concentration (initial pH=6.00, [PMS]=0.20 mg L<sup>-1</sup>).

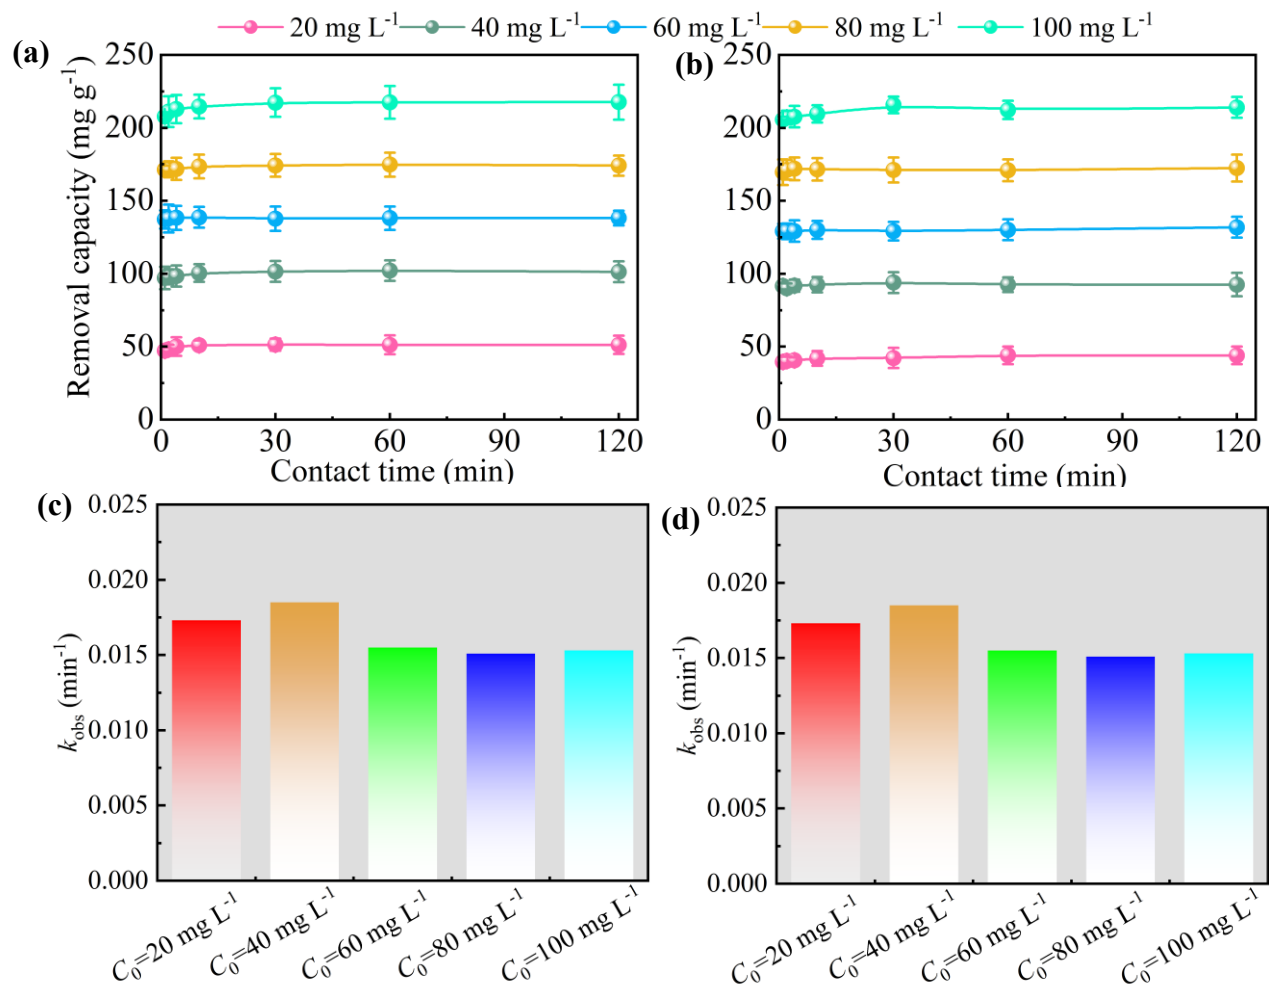

**Fig. S5. Total Fe and Fe( II ) leakage over 5 cycles. Error bars represent the standard deviations ( $n=3$ ); different lowercase letters represent significant difference between different treatments ( $P < 0.05$ ).**

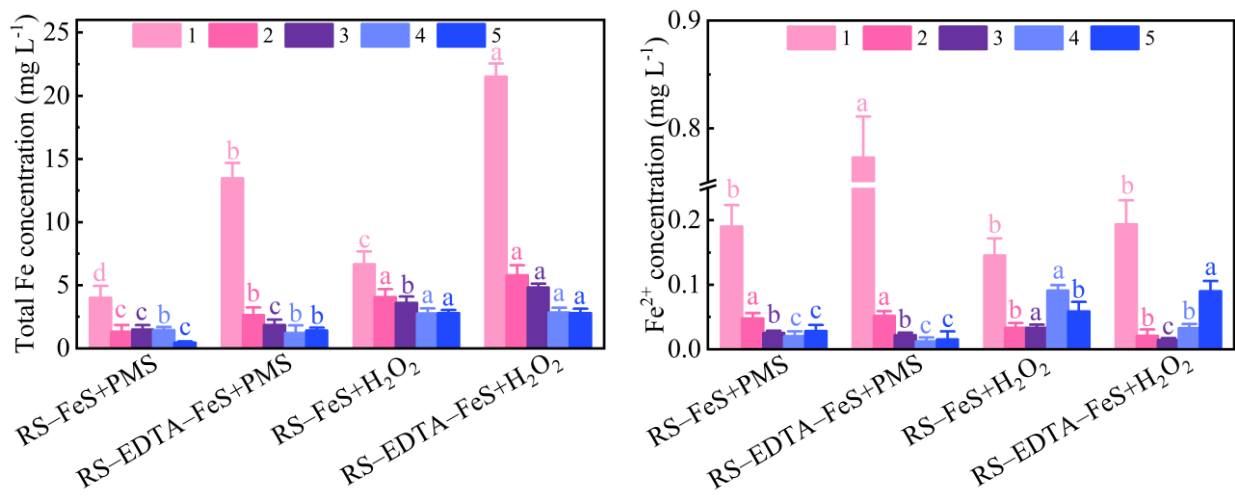

Supplement: s1 [file s1]
